# Supplementary material for: Correlates of resistin and retinol-binding protein 4 in metabolic syndrome patients with and without prediabetes
Source: publisher site journal article supplement (doi:10.1515/hmbci-2018-0051), 2019-01-22
Supplement: Supplementary file 1 [file hmbci-2018-0051_suppl.docx]

**SUPPLEMENTARY**

**Table 1a. Indices of anthropometric adiposity, atherogenisity and hematological used in this study, reference, and equation for calculation.**

| **Measure** | **Author (year)** | **Equations** |
| --- | --- | --- |
| Waist-to-hip ratio (WHR) | WHO, (1) | WHR=waist circumference (cm)÷ hip circumference (cm) |
| Waist-to-height ratio (WHtR) | Hsieh et al, (2) | WHtR=waist circumference (cm)÷height (cm) |
| Conicity index (CI) | Valdez, (3) | CI=waist circumference (cm)÷0.109**√**weight(kg)÷height(m) |
| Body adiposity index (BAI) | Bergman et al, (4) | BAI= [hip circumferemce (cm) /(height (m)1.5) ]-18 |
| Lipid accumulation product (LAP) | Kahn and Valdez, (5) | LAP = (waist circumference [cm]−65) × (triglyceride concentration [mM]) for men  LAP = (waist circumference [cm] − 58) × (triglyceride concentration [mM]) for women |
| Visceral adipocity index (VAI) | DeNino et al., (6) | VAI=waist circumference (cm)÷39.68+(1.88*BMI) *(triglyceride concentration÷1.03)* (1.31÷HDL-C) for male  VAI=waist circumference (cm)÷36.58+(1.89*BMI) *(triglyceride concentration÷0.81)* (1.52÷HDL-C) for female |
| Atherogenic index of plasma (AIP) | Dobiášová, (7) | AIP = Log10 (triglyceride concentration/HDL-C) |
| Total cholesterol/HDL-C (TC/HDL-C) ratio | Ascaso et al., (8) | Total cholesterol/HDL-C =Total cholesterol ÷ HDL- C |
| LDL-C/HDL-C ratio | LDL-C/HDL-C=LDL-C ÷ HDL-C |
| Non-HDL-C | Virani, (9) | Non-HDL.C=total cholesterol-HDL.C |
| Platelet-to lymphocyte ratio (PLR) | Mete Ural, (10) | PLR= Platelets ÷ Lymphocytes |
| Neutrophil-to-lymphocyte ratio (NLR) | Mete Ural, (10) | NLR= Neutrophils ÷ Lymphocytes |
| Monocyte-to-lymphocyte ratio (MLR) | Ji et al., (11) | MLR= Monocytes ÷ Lymphocytes |

**REFERENCES**

1. World Health Organization (WHO; 2008), Waist Circumference and Waist–Hip Ratio: Report of a WHO Expert Consultation. Geneva, 1-31. Available at http://apps.who.int/iris/bitstream/handle/10665/44583/9789241501491_eng.pdf;jsessionid=74FEA674E1A79EB9FF1DDEE0BDB39B09?sequence=1. Last accessed April 17th, 2018.
2. Hsieh, S.D., Yoshinaga, H., Waist/height ratio as a simple and useful predictor of coronary heart disease risk factors in women. Intern. Med. 1995;34(12):1147-1152.
3. Valdez, R., A simple model-based index of abdominal adiposity. J. Clin. Epidemiol. 1991; 44(9):955-956.
4. Bergman, R.N., Stefanovski, D., Buchanan, T.A., et al., A Better Index of Body Adiposity. Obesity, 2011; 19(5):1083-1089.
5. Kahn, H.S., Valdez, R., Metabolic risks identified by the combination of enlarged waist and elevated triacylglycerol concentration. Am. J. Clin. Nutr. 2003; 78:928–934.
6. DeNino, W.F., Tchernof, A., Dionne, I.J., et al., Contribution of abdominal adiposity to age-related differences in insulin sensitivity and plasma lipids in healthy non-obese women. Diabetes Care, 2001; 24(5): 925–932.
7. Dobiasova, M., AIP—atherogenic index of plasma as a significant predictor of cardiovascular risk: from research to practice. VnitrniLekarstvi. 2006;52(1): 64–71.
8. Ascaso J, González Santos P, Hernández Mijares A, et al., Management of dyslipidemia in the metabolic syndrome. Recommendations of the Spanish HDL Forum. Am. J. Cardiovasc. Drugs. 2007;7(1):39–58.
9. Virani, S.S., Non-HDL cholesterol as a metric of good quality of care: opportunities and challenges. Texas Heart Inst. J.; 2011; 38(2):160-162.
10. Mete Ural, U., Sehitoglu, I., BayogluTekin, Y., KirSahin, F., Neutrophil-to-lymphocyte and platelet-to-lymphocyte ratios in patients with endometrial hyperplasia and endometrial can¬cer¬. J. Obstetr. Gyn. Res. 2015; 41(3):445-448.
11. Ji, H., Li, Y., Fan, Z., et al., Monocyte/lymphocyte ratio predicts the severity of coronary artery disease: a syntax score assessment. BMC Cardiovasc. Dis. 2017;17(1):1-8.
